# Supplementary material for: Synthesis of CrOx/C catalysts for low temperature NH3-SCR with enhanced regeneration ability in the presence of SO2
Source: Royal Society of Chemistry journal article supplement (doi:10.1039/c7ra09680a), 2018-01-01
Supplement: c7ra09680a1.pdf [file c7ra09680a1.pdf]

## Supporting information

# Synthesis of CrO<sub>x</sub>/C catalyst for low temperature NH<sub>3</sub>-SCR with enhanced regeneration ability in the presence of SO<sub>2</sub>

*Shuohan Yu<sup>a,b</sup>, Sheng Xu<sup>c</sup>, Bowen Sun<sup>a,b</sup>, Yiyang Lu<sup>a,b</sup>, Lulu Li<sup>a,b</sup>, Weixin Zou<sup>a,b</sup>, Peng Wang<sup>c</sup>,*

*Fei Gao<sup>\*a,b</sup>, Changjin Tang<sup>a,b</sup>, Lin Dong<sup>\*a,b</sup>*

- <sup>a.</sup> Key Laboratory of Mesoscopic Chemistry of MOE, School of Chemistry and Chemical Engineering, Nanjing University, Nanjing 210093, PR China
- <sup>b.</sup> Jiangsu Key Laboratory of Vehicle Emissions Control, Center of Modern Analysis, Nanjing University, Nanjing 210093, PR China
- <sup>c.</sup> National Laboratory of Solid State Microstructures, College of Engineering and Applied Sciences and Collaborative Innovation Center of Advanced Microstructures, Nanjing University, Nanjing 210093, China

## Band energy calculation of metal-oxygen band in Cr<sub>2</sub>O<sub>3</sub> and MnO<sub>2</sub>

Due to the ligancy of Cr in Cr<sub>2</sub>O<sub>3</sub> is 6, each Cr<sub>2</sub>O<sub>3</sub> unit have 12 Cr-O bands, and thus the enthalpy of Eq. 1 equals 12 times of Cr-O band energy.

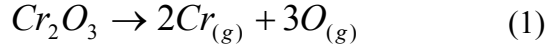

Eq. 1 can be depicted as 2×Eq. 3+3/2×Eq. 4-Eq. 2.

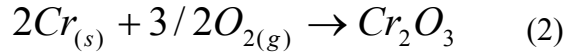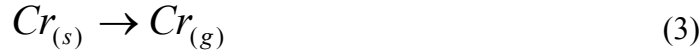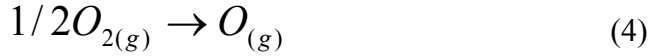

Enthalpies of Eq. 2-4 are formation enthalpy of Cr<sub>2</sub>O<sub>3</sub>  $\Delta H_f(Cr_2O_3)$ , vaporization enthalpy of Cr solid  $\Delta H_{vap}(Cr)$ , and formation enthalpy of oxygen atom  $\Delta H_f(O)$ , respectively.

Therefore, band energy of Cr-O band  $E_{Cr-O}$  can be expressed as Eq. 5.

$$E_{Cr-O} = \frac{2 \times \Delta H_{vap}(Cr) + 3 \times \Delta H_f(O) - \Delta H_f(Cr_2O_3)}{12} \quad (5)$$

Analogously, band energy of Mn-O band in MnO<sub>2</sub>  $E_{Mn-O}$  can be expressed as Eq. 6.

$$E_{Mn-O} = \frac{\Delta H_{vap}(Mn) + 2 \times \Delta H_f(O) - \Delta H_f(MnO_2)}{6} \quad (6)$$

**Table S1.** Thermochemical data of some metal oxide.

| Metal oxide                    | Sulfating process                                   | Gibbs free energy (kJ/mol) <sup>a</sup> | Melting point (°C) |
|--------------------------------|-----------------------------------------------------|-----------------------------------------|--------------------|
| Cr <sub>2</sub> O <sub>3</sub> | $2Cr_2O_3 + 6SO_2 + 3O_2 \rightarrow 2Cr_2(SO_4)_3$ | -1139.54                                | 2435               |
| CoO                            | $2CoO + 2SO_2 + O_2 \rightarrow 2CoSO_4$            | -463.265                                | 1933               |
| Fe <sub>2</sub> O <sub>3</sub> | $2Fe_2O_3 + 6SO_2 + 3O_2 \rightarrow 2Fe_2(SO_4)_3$ | -1070.86                                | 1539               |
| CuO                            | $2CuO + 2SO_2 + O_2 \rightarrow 2CuSO_4$            | -409.611                                | 1326               |
| MnO <sub>2</sub>               | $MnO_2 + SO_2 \rightarrow MnSO_4$                   | -172.871                                | 535                |

<sup>a</sup> Thermodynamic data was obtained from Lange's Chemistry Handbook Version 13th.

**Table S2.** Kinetics data of NH<sub>3</sub>-SCR on CrO<sub>x</sub>/C-450 and Cr<sub>2</sub>O<sub>3</sub>/C-WI catalysts.

| Samples                   | CrO <sub>x</sub> /C-450 |      |      | Cr <sub>2</sub> O <sub>3</sub> /C-WI |      |      |
|---------------------------|-------------------------|------|------|--------------------------------------|------|------|
|                           | 125                     | 150  | 175  | 125                                  | 150  | 175  |
| Reaction temperature (°C) | 125                     | 150  | 175  | 125                                  | 150  | 175  |
| [NO] <sub>out</sub>       | 453                     | 409  | 343  | 489                                  | 467  | 421  |
| NO conversity (%)         | 9.32                    | 18.1 | 31.2 | 2.15                                 | 6.46 | 15.7 |

**Table S3.** Kinetics data of NH<sub>3</sub>-SCR on CrO<sub>x</sub>/C-450 and Cr<sub>2</sub>O<sub>3</sub>/C-WI catalysts, when NH<sub>3</sub> concentration was maintained at 500 ppm.

| Reaction                             |                    |                     |                    |                     |                    |                     |
|--------------------------------------|--------------------|---------------------|--------------------|---------------------|--------------------|---------------------|
| temperature                          | 125                |                     | 150                |                     | 175                |                     |
| (°C)                                 |                    |                     |                    |                     |                    |                     |
| Feed gas                             |                    |                     |                    |                     |                    |                     |
| content (ppm)                        | [NO] <sub>in</sub> | [NO] <sub>out</sub> | [NO] <sub>in</sub> | [NO] <sub>out</sub> | [NO] <sub>in</sub> | [NO] <sub>out</sub> |
| CrO <sub>x</sub> /C-450              | 205                | 183                 | 205                | 167                 | 205                | 151                 |
|                                      | 146                | 133                 | 146                | 120                 | 146                | 100                 |
|                                      | 88                 | 78                  | 88                 | 71                  | 88                 | 62                  |
| Cr <sub>2</sub> O <sub>3</sub> /C-WI | 128                | 125                 | 128                | 119                 | 128                | 108                 |
|                                      | 63                 | 60                  | 63                 | 55                  | 63                 | 41                  |
|                                      | 215                | 212                 | 215                | 207                 | 215                | 194                 |

**Table S4.** Kinetics data of NH<sub>3</sub>-SCR on CrO<sub>x</sub>/C-450 and Cr<sub>2</sub>O<sub>3</sub>/C-WI catalysts, when NO concentration was maintained at 500 ppm.

| Reaction                             |                    |                     |                    |                     |                    |                     |
|--------------------------------------|--------------------|---------------------|--------------------|---------------------|--------------------|---------------------|
| temperature                          | 125                |                     | 150                |                     | 175                |                     |
| (°C)                                 |                    |                     |                    |                     |                    |                     |
| Feed gas                             |                    |                     |                    |                     |                    |                     |
| content (ppm)                        | [NO] <sub>in</sub> | [NO] <sub>out</sub> | [NO] <sub>in</sub> | [NO] <sub>out</sub> | [NO] <sub>in</sub> | [NO] <sub>out</sub> |
|                                      | 178                | 162                 | 178                | 145                 | 178                | 122                 |
| CrO <sub>x</sub> /C-450              | 111                | 100                 | 111                | 86                  | 111                | 66                  |
|                                      | 55                 | 47                  | 55                 | 38                  | 55                 | 26                  |
|                                      | 140                | 133                 | 140                | 120                 | 140                | 97                  |
| Cr <sub>2</sub> O <sub>3</sub> /C-WI | 60                 | 56                  | 60                 | 45                  | 60                 | 31                  |
|                                      | 212                | 204                 | 212                | 187                 | 212                | 160                 |

**Table S5.** Band energy calculation of metal-oxygen band in Cr<sub>2</sub>O<sub>3</sub> and MnO<sub>2</sub>.

| Metal oxide                                                | Cr <sub>2</sub> O <sub>3</sub> | MnO <sub>2</sub> |
|------------------------------------------------------------|--------------------------------|------------------|
| Formation enthalpy of metal oxide (kJ/mol) <sup>a</sup>    | -1134.97                       | -520.15          |
| Vaporization enthalpy of metal solid (kJ/mol) <sup>a</sup> | 397.58                         | 280.81           |
| Formation enthalpy of oxygen atom (kJ/mol) <sup>a</sup>    | 249.23                         |                  |
| Band energy of metal-oxygen band (kJ/mol)                  | 223.15                         | 216.57           |

<sup>a</sup> Thermodynamic data was obtained from Lange's Chemistry Handbook Version 13th.

**Table S6.** Mass of metal sulfate formed on catalysts.

| catalysts               | Metal sulfate                                   | $m_{M^{n+}}$ (mg/L) | $m_{MSO_4}$ (mg) |
|-------------------------|-------------------------------------------------|---------------------|------------------|
| MnO <sub>2</sub>        | MnSO <sub>4</sub>                               | 34.4                | 4.7              |
| CrO <sub>x</sub> /C-450 | Cr <sub>2</sub> (SO <sub>4</sub> ) <sub>3</sub> | 0                   | 0                |



**Table S7.** Surface atomic concentration of SO<sub>2</sub> poisoned CrO<sub>x</sub>/C-450 sample.

| S <sub>total</sub> (%) | N <sub>total</sub> (%) | NH <sub>3</sub> (%) | NH <sub>4</sub> <sup>+</sup> (%) |
|------------------------|------------------------|---------------------|----------------------------------|
| 2.69                   | 3.63                   | 1.08                | 2.55                             |

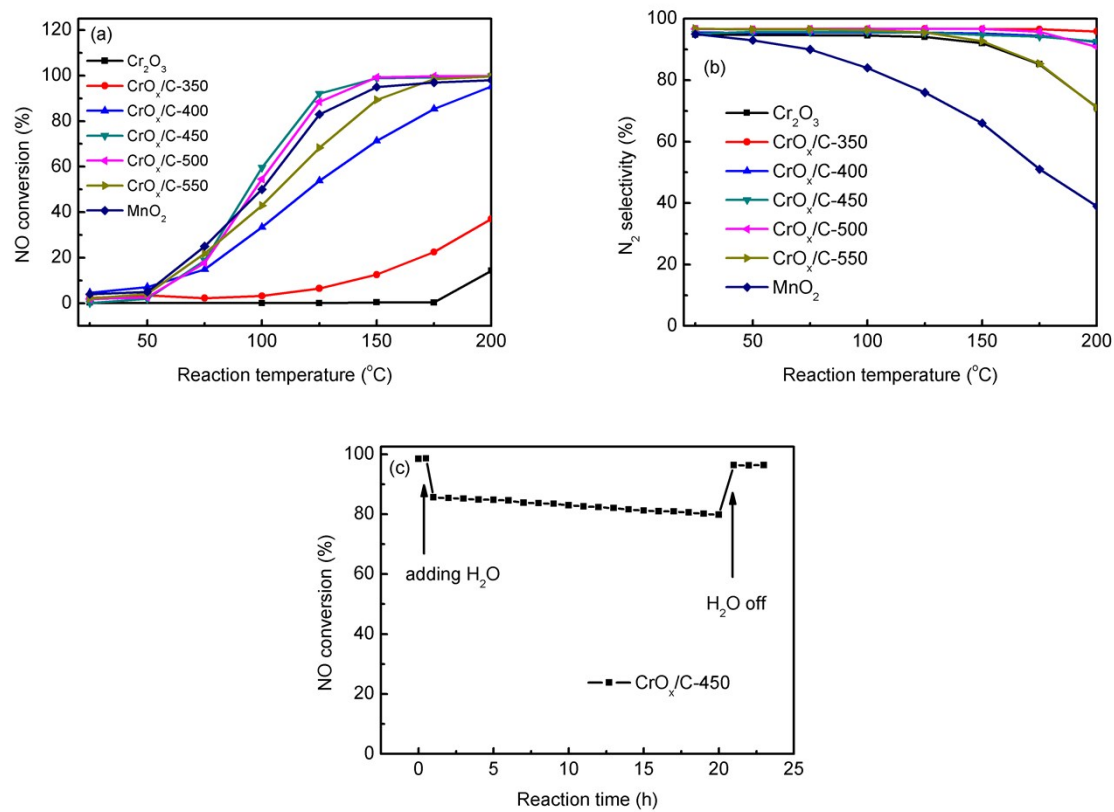

**Figure S1.** NH<sub>3</sub>-SCR activity of catalysts derived from MIL-101 and Cr<sub>2</sub>O<sub>3</sub>: (a) NO conversion, (b) N<sub>2</sub> selectivity, and (c) water tolerance of CrO<sub>x</sub>/C-450.

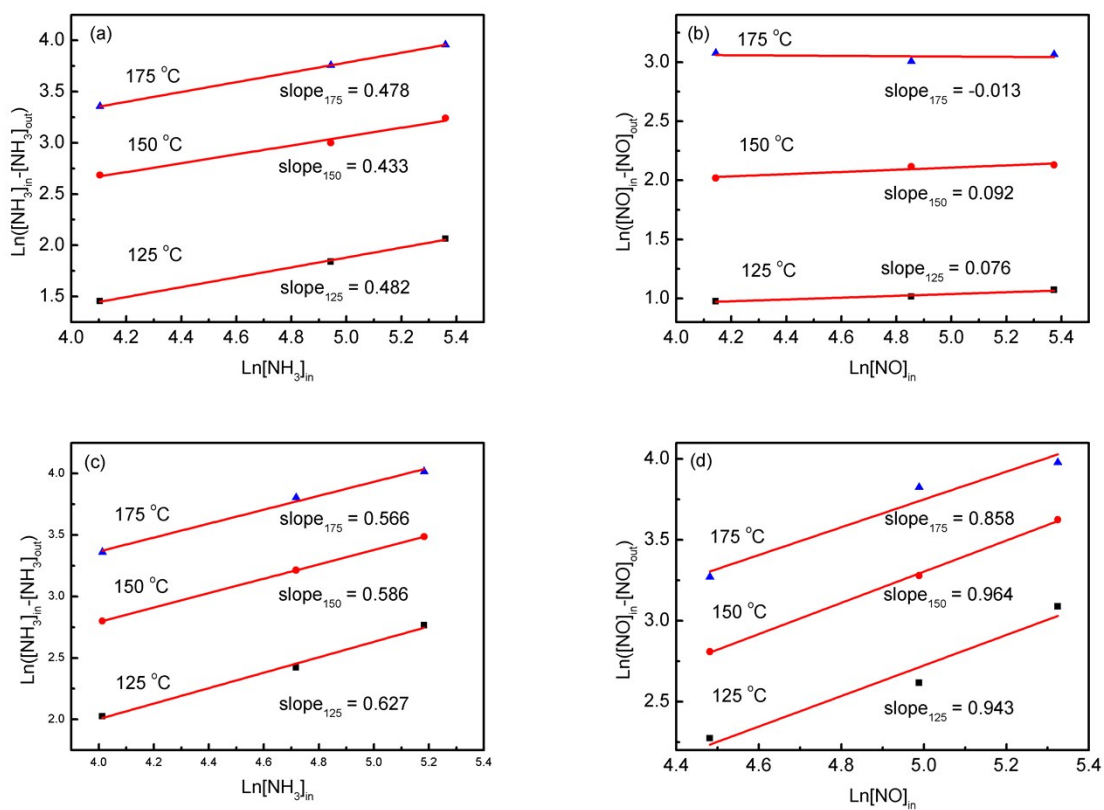

**Figure S2.** (a, b) Kinetics curves of NH<sub>3</sub>-SCR on Cr<sub>2</sub>O<sub>3</sub>/C-WI catalysts: (a) NO concentration was maintained at 500 ppm, (b) NH<sub>3</sub> concentration was maintained at 500 ppm, and (c, d) Kinetics curves of NH<sub>3</sub>-SCR on CrO<sub>x</sub>/C-450 (a) NO concentration was maintained at 500 ppm, (b) NH<sub>3</sub> concentration was maintained at 500 ppm.

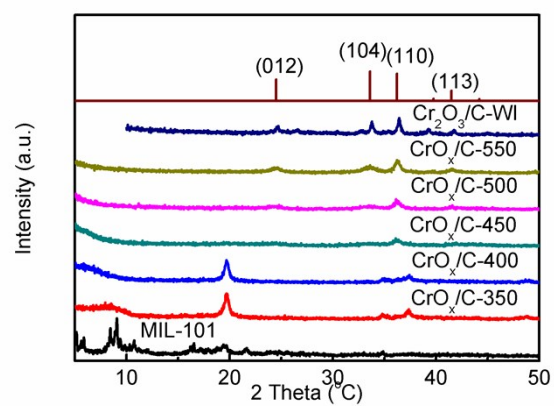

**Figure S3.** XRD patterns of catalysts.

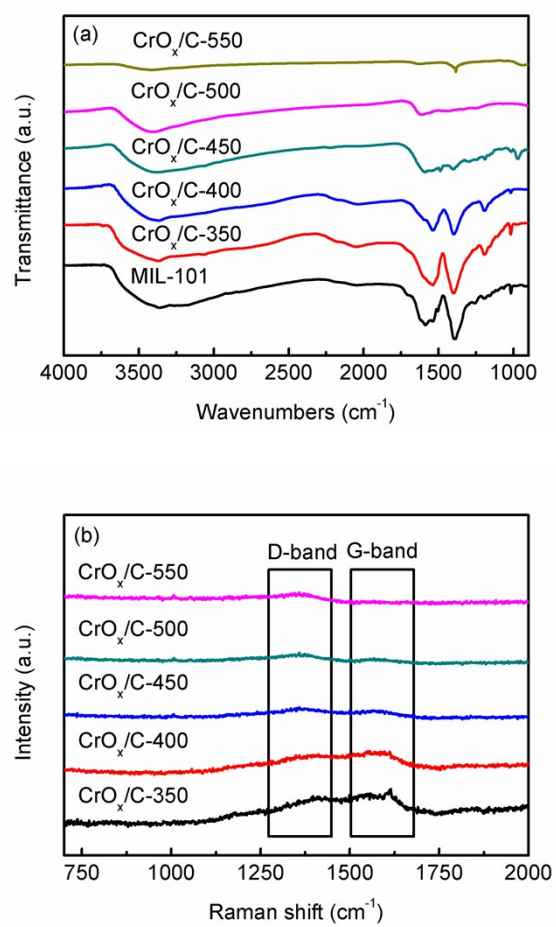

**Figure S4.** (a) FTIR and (b) Raman profiles of catalysts and MIL-101.

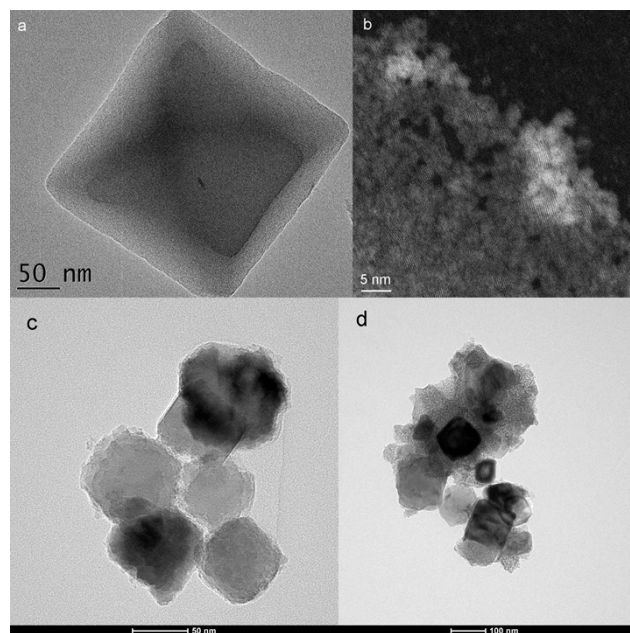

**Figure S5.** (a) TEM image of MIL-101, (b) HAADF image of regenerated CrO<sub>x</sub>/C-450 catalyst, (c) TEM image of bulk Cr<sub>2</sub>O<sub>3</sub>, and (d) TEM image of Cr<sub>2</sub>O<sub>3</sub>/C-WI.

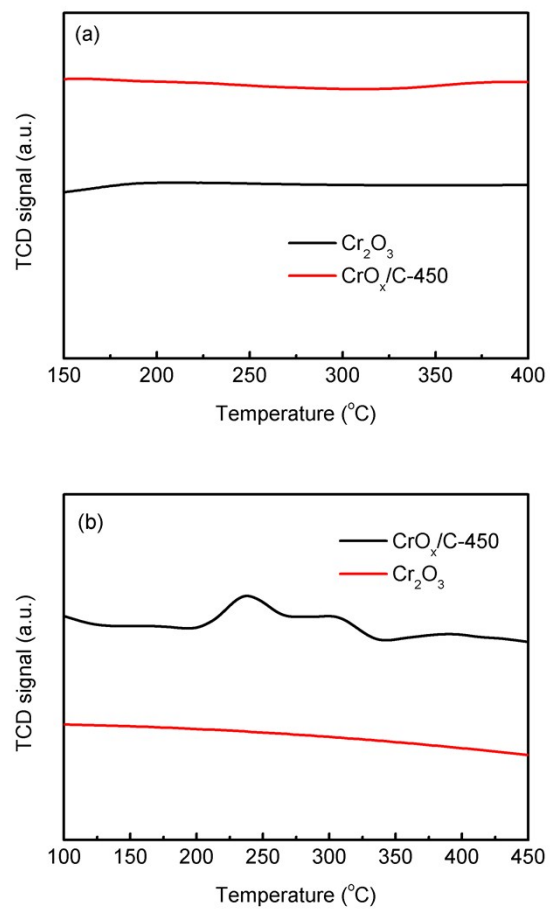

**Figure S6.** (a) NH<sub>3</sub>-TPD, and (b) O<sub>2</sub>-TPD profiles of CrO<sub>x</sub>/C-450 and Cr<sub>2</sub>O<sub>3</sub>.

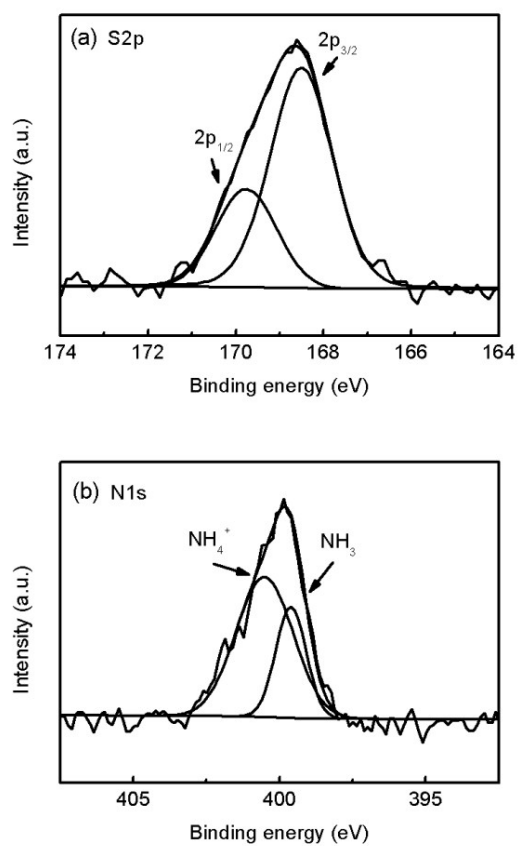

**Figure S7.** XPS spectra of SO<sub>2</sub> poisoned CrO<sub>x</sub>/C-450 catalyst: (a) S2p, and (b) N1s.
